# Supplementary material for: Response of bacterioplankton community structure to an artificial gradient of p CO 2 in the Arctic Ocean
Source: Copernicus journal article supplement (doi:10.5194/bg-10-3679-2013), 2013-06-04
Supplement: Supplementary file 1 [file bg-10-3679-2013-supplement.pdf]

**Response of bacterioplankton community structure to an artificial  
gradient of  $p\text{CO}_2$  in the Arctic Ocean**

R. Zhang<sup>1,2,\*</sup>, X. Xia<sup>1,2,\*</sup>, S.C.K. Lau<sup>3</sup>, C. Motegi<sup>4</sup>, M.G. Weinbauer<sup>4</sup>, N Jiao<sup>1,2</sup>

<sup>1</sup>State Key Laboratory of Marine Environmental Science, Xiamen University, Xiamen  
361005, PR China

<sup>2</sup>Institute of Marine Microbes and Ecospheres, Xiamen University, Xiamen, 361005,  
China

<sup>3</sup>Division of Life Science and Division of Environment, The Hong Kong University  
of Science and Technology, Clear Water Bay, Kowloon, Hong Kong SAR, PR China

<sup>4</sup>Microbial Ecology and Biogeochemistry Group, Université Pierre et Marie  
Curie-Paris 6, Laboratoire d'Océanographie de Villefranche, 06230  
Villefranche-sur-Mer, France; CNRS, Laboratoire d'Océanographie de Villefranche,  
06230 Villefranche-sur-Mer, France

\*These authors contributed equally to this work.

**Correspondence to:**

N. Jiao (jiao@xmu.edu.cn)

M.G. Weinbauer (wein@obs-vlfr.fr)

1 Fig. S1. MDS plots, based on single enzyme digested T-RFLP analysis, showing  
2 bacterial community dynamics during mesocosm experiment. A: displaying  
3 with mesocosm; B: displaying with incubation time.

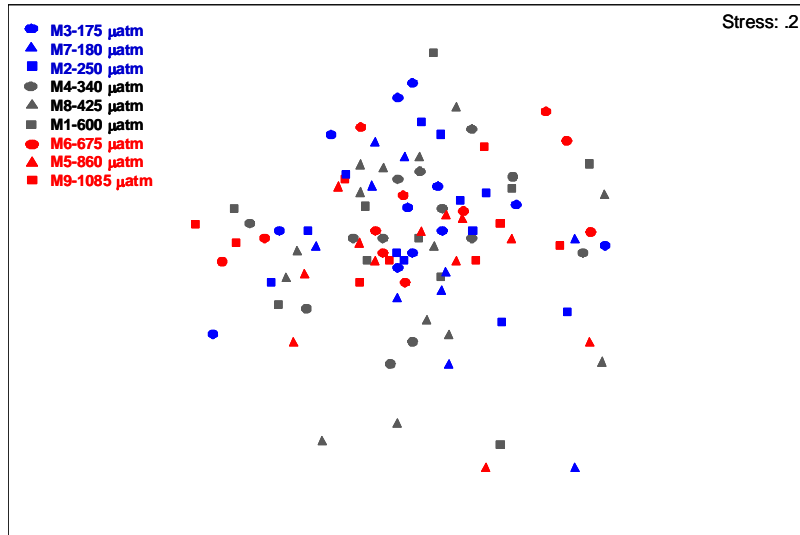

4

5

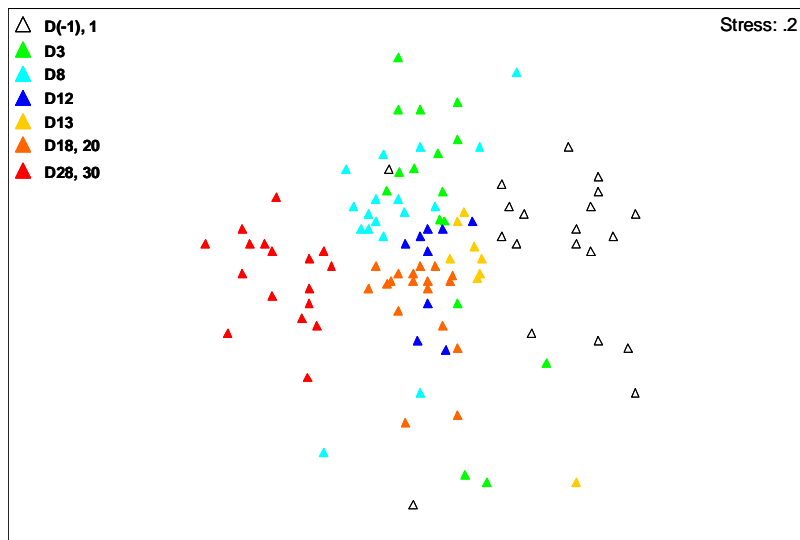

6

7

8

1 Fig. S2. Rare fraction analysis of eight clone libraries constructed for Day30 samples.

2

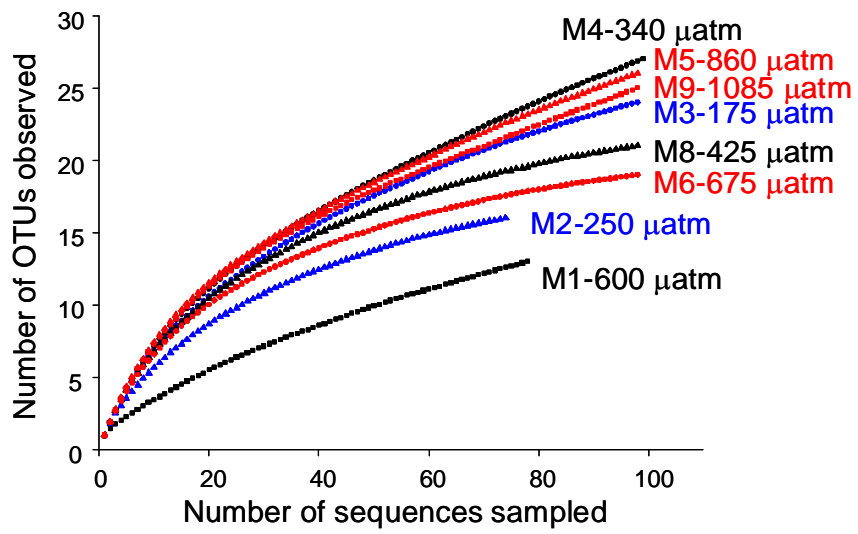

3

Table S1. ANOSIM analysis based on the matrix of T-RF position and peak area showing similarity among nine mesocoms. R statistic and significance level (%) are shown for each pair comparison.

|                         | M3-175 $\mu\text{atm}$ | M7-180 $\mu\text{atm}$ | M2-250 $\mu\text{atm}$ | M4-340 $\mu\text{atm}$ | M8-425 $\mu\text{atm}$ | M1-600 $\mu\text{atm}$ | M6-675 $\mu\text{atm}$ | M5-860 $\mu\text{atm}$ | M9-1085 $\mu\text{atm}$ |
|-------------------------|------------------------|------------------------|------------------------|------------------------|------------------------|------------------------|------------------------|------------------------|-------------------------|
| M3-175 $\mu\text{atm}$  |                        |                        |                        |                        |                        |                        |                        |                        |                         |
| M7-180 $\mu\text{atm}$  | -0.041 (89.2)          |                        |                        |                        |                        |                        |                        |                        |                         |
| M2-250 $\mu\text{atm}$  | -0.063 (98.3)          | -0.022 (70.3)          |                        |                        |                        |                        |                        |                        |                         |
| M4-340 $\mu\text{atm}$  | -0.059 (97.1)          | -0.021 (69.8)          | -0.058 (99.0)          |                        |                        |                        |                        |                        |                         |
| M8-425 $\mu\text{atm}$  | -0.053 (94.8)          | -0.026 (73.5)          | -0.055 (96.9)          | -0.036 (88.7)          |                        |                        |                        |                        |                         |
| M1-600 $\mu\text{atm}$  | -0.030 (79.0)          | -0.014 (62.0)          | 0.007 (34.4)           | -0.033 (82.5)          | -0.020 (66.1)          |                        |                        |                        |                         |
| M6-675 $\mu\text{atm}$  | -0.008 (50.7)          | 0.035 (14.9)           | -0.003 (43.6)          | -0.019 (71.5)          | -0.015 (63.8)          | -0.017 (63.8)          |                        |                        |                         |
| M5-860 $\mu\text{atm}$  | -0.050 (96.5)          | -0.036 (89.9)          | -0.030 (83.8)          | -0.030 (84.5)          | -0.049 (97.0)          | -0.030 (80.5)          | -0.005 (50.5)          |                        |                         |
| M9-1085 $\mu\text{atm}$ | -0.024 (71.5)          | 0.011 (32.0)           | -0.020 (70.7)          | -0.013 (62.3)          | -0.053 (98.6)          | -0.018 (63.7)          | -0.017 (68.1)          | -0.024 (76.2)          |                         |



---

|    |        |        |         |        |        |        |        |        |        |        |        |        |        |        |        |        |        |        |
|----|--------|--------|---------|--------|--------|--------|--------|--------|--------|--------|--------|--------|--------|--------|--------|--------|--------|--------|
| 4  | 0.1)   | 0.1)   | .1)     | 0.1)   | 0.1)   | 0.1)   | 0.1)   | 0.1)   | 0.4)   | 18.3)  |        |        |        |        |        |        |        |        |
| D1 | 0.614( | 0.573( | 0.721(0 | 0.626( | 0.828( | 0.482( | 0.744( | 0.192( | 0.182( | 0.132( | 0.057( |        |        |        |        |        |        |        |
| 6  | 0.1)   | 0.1)   | .1)     | 0.1)   | 0.1)   | 0.1)   | 0.1)   | 5.3)   | 5.3)   | 5.3)   | 22.3)  |        |        |        |        |        |        |        |
| D1 | 0.725( | 0.597( | 0.611(0 | 0.538( | 0.685( | 0.421( | 0.505( | 0.193( | 0.226( | 0.152( | 0.221( | 0.003( |        |        |        |        |        |        |
| 8  | 0.2)   | 0.1)   | .1)     | 0.1)   | 0.1)   | 0.1)   | 0.1)   | 1.3)   | 0.3)   | 1.4)   | 0.2)   | 40.8)  |        |        |        |        |        |        |
| D2 | 0.909( | 0.752( | 0.771(0 | 0.657( | 0.798( | 0.621( | 0.606( | 0.342( | 0.301( | 0.418( | 0.450( | 0.113( | 0.035( |        |        |        |        |        |
| 0  | 0.1)   | 0.1)   | .1)     | 0.1)   | 0.1)   | 0.1)   | 0.1)   | 0.2)   | 0.1)   | 0.1)   | 0.1)   | 10.8)  | 22.8)  |        |        |        |        |        |
| D2 | 0.824( | 0.626( | 0.650(0 | 0.592( | 0.754( | 0.545( | 0.619( | 0.284( | 0.390( | 0.417( | 0.478( | 0.224( | 0.066( | 0.052( |        |        |        |        |
| 2  | 0.1)   | 0.1)   | .1)     | 0.1)   | 0.1)   | 0.1)   | 0.1)   | 0.1)   | 0.1)   | 0.1)   | 0.1)   | 1.6)   | 12.2)  | 18.6)  |        |        |        |        |
| D2 | 0.911( | 0.659( | 0.684(0 | 0.635( | 0.836( | 0.636( | 0.612( | 0.365( | 0.459( | 0.547( | 0.609( | 0.299( | 0.164( | 0.034( | 0.051( |        |        |        |
| 4  | 0.1)   | 0.1)   | .1)     | 0.1)   | 0.1)   | 0.1)   | 0.1)   | 0.9)   | 0.2)   | 0.2)   | 0.1)   | 0.6)   | 2.9)   | 27.6)  | 24.0)  |        |        |        |
| D2 | 0.943( | 0.653( | 0.818(0 | 0.684( | 0.934( | 0.712( | 0.761( | 0.540( | 0.641( | 0.824( | 0.854( | 0.673( | 0.528( | 0.542( | 0.268( | 0.209( |        |        |
| 6  | 0.1)   | 0.1)   | .2)     | 0.1)   | 0.1)   | 0.1)   | 0.1)   | 0.1)   | 0.2)   | 0.1)   | 0.1)   | 0.2)   | 0.2)   | 0.1)   | 1.8)   | 3.9)   |        |        |
| D2 | 0.951( | 0.794( | 0.838(0 | 0.750( | 0.891( | 0.848( | 0.759( | 0.519( | 0.484( | 0.780( | 0.679( | 0.464( | 0.474( | 0.522( | 0.312( | 0.405( | 0.106( |        |
| 8  | 0.1)   | 0.1)   | .1)     | 0.1)   | 0.1)   | 0.1)   | 0.1)   | 0.1)   | 0.1)   | 0.1)   | 0.1)   | 0.2)   | 0.1)   | 0.1)   | 0.3)   | 0.1)   | 11.0)  |        |
| D3 | 0.939( | 0.810( | 0.901(0 | 0.750( | 0.967( | 0.866( | 0.948( | 0.719( | 0.875( | 0.863( | 0.943( | 0.828( | 0.650( | 0.825( | 0.517( | 0.574( | 0.222( | 0.351( |
| 0  | 0.1)   | 0.1)   | .1)     | 0.1)   | 0.1)   | 0.1)   | 0.2)   | 0.1)   | 0.1)   | 0.1)   | 0.1)   | 0.1)   | 0.2)   | 0.1)   | 0.1)   | 0.1)   | 1.5)   | 0.1)   |

---

Table S3. Pair comparisons of clone library using Libshuff analysis.  $C_{\text{column, row}}$  and  $C_{\text{row, column}}$  are given above and below the diagonal, respectively. P values of less than 0.05 are in bold. Underlining indicates that both  $C_{\text{column, row}}$  and  $C_{\text{row, column}}$  are significant.

|    | M3                | M2                | M4            | M8            | M1                | M6            | M5            | M9            |
|----|-------------------|-------------------|---------------|---------------|-------------------|---------------|---------------|---------------|
| M3 |                   | <b>&lt;0.0001</b> | 0.2613        | 0.083         | <b>&lt;0.0001</b> | <b>0.0018</b> | <b>0.0167</b> | <b>0.0309</b> |
| M2 | <b>0.0166</b>     |                   | 0.3881        | 0.9202        | <b>0.012</b>      | 0.0719        | 0.7214        | 0.2917        |
| M4 | <b>0.0241</b>     | 0.5284            |               | 0.7007        | <b>0.0243</b>     | 0.2199        | 0.5103        | 0.15          |
| M8 | <b>0.0214</b>     | <b>&lt;0.0001</b> | <b>0.0191</b> |               | <b>0.0012</b>     | <b>0.0057</b> | <b>0.0468</b> | 0.1291        |
| M1 | 0.5041            | 0.4231            | 0.3848        | 0.388         |                   | 0.2846        | 0.6417        | 0.0837        |
| M6 | <b>&lt;0.0001</b> | <b>0.0002</b>     | 0.1391        | <b>0.0491</b> | <b>0.001</b>      |               | 0.616         | <b>0.0098</b> |
| M5 | <b>0.002</b>      | <b>0.0002</b>     | 0.602         | <b>0.0309</b> | <b>0.0009</b>     | 0.2673        |               | <b>0.0073</b> |
| M9 | <b>0.0295</b>     | <b>0.0016</b>     | 0.1932        | 0.6272        | <b>0.0148</b>     | 0.0974        | 0.5661        |               |
